# Supplementary material
Source: PubMed Central journal article supplement (PMC4280314)
Supplement: NIHMS630189-supplement-Supp_TableS1.pdf [file NIHMS630189-supplement-Supp_TableS1.pdf]

**Supplementary Table 1.** Descriptive statistics (Means, SD) of kinetics and peak kinematic values in the first 60% of stance during self-selected and standardized gait for patients with JFM and healthy controls.

|                        | Self-Selected Pace |              |                  | Standardized Pace |              |                  |
|------------------------|--------------------|--------------|------------------|-------------------|--------------|------------------|
|                        | JFM                | Controls     | <i>p</i>         | JFM               | Controls     | <i>p</i>         |
|                        | M (SD)             | M (SD)       |                  | M (SD)            | M (SD)       |                  |
| <b>Kinetics</b>        |                    |              |                  |                   |              |                  |
| Gait Speed (m/s)       | 1.09 (0.14)        | 1.15 (0.11)  | .20              | -                 | -            | -                |
| Stride Length(m)       | 0.66 (0.06)        | 0.71 (0.04)  | .04*             | 0.70 (0.05)       | 0.73 (0.04)  | .06              |
| <b>Peak Values (°)</b> |                    |              |                  |                   |              |                  |
| Hip Flexion            | 27.30 (4.51)       | 26.87 (4.63) | .80              | 28.27 (4.40)      | 28.28 (4.88) | .99              |
| Hip Adduction          | 9.61 (3.00)        | 10.54 (2.22) | .36              | 10.00 (2.80)      | 10.52 (2.59) | .61              |
| Hip Internal Rotation  | 0.03 (3.16)        | 0.91 (3.76)  | .51              | 0.38 (4.01)       | 1.47 (3.91)  | .23              |
| Knee Flexion           | 13.82 (8.21)       | 14.89 (7.60) | .73              | 15.45 (7.96)      | 17.47 (7.48) | .49              |
| Knee Abduction         | 2.37 (2.60)        | 2.90 (1.45)  | .52              | 2.50 (2.49)       | 2.83 (1.39)  | .67              |
| Knee Internal Rotation | 5.05 (3.53)        | 2.30 (2.87)  | .03 <sup>†</sup> | 4.88 (2.93)       | 2.25 (3.56)  | .04 <sup>†</sup> |
| Ankle Dorsiflexion     | 7.10 (3.59)        | 6.42 (2.73)  | .58              | 6.98 (2.96)       | 7.54 (4.08)  | .68              |
| Ankle Eversion         | 5.91 (2.41)        | 5.71 (1.90)  | .81              | 5.75 (2.42)       | 5.25 (1.78)  | .54              |

\*  $p < .05$ ; <sup>†</sup>  $p$ -levels for peak values demonstrate trend toward significance following Bonferroni correction
